# Supplementary material
Source: Springer Nature journal article supplement (https://www.springermedizin.de/resource/supplementary/12960_2013_428_MOESM1_ESM.pdf/9570058)
Supplement: MOESM1 [file 9570058]

| Codes                                                                                                                                                                                                                                     | Categories                                  | Themes                                |
|-------------------------------------------------------------------------------------------------------------------------------------------------------------------------------------------------------------------------------------------|---------------------------------------------|---------------------------------------|
| <ul style="list-style-type: none"> <li>-Advertising CHA position</li> <li>-CHA selection committee</li> <li>-Attending CHA interviews</li> </ul>                                                                                          | CHA recruitment process                     | Becoming a Community Health Assistant |
| <ul style="list-style-type: none"> <li>-Training in community health services</li> <li>-Working as community health worker</li> <li>-Working as traditional birth attendant</li> <li>-Member of neighbourhood health committee</li> </ul> | Motivation for becoming A CHA               |                                       |
| <ul style="list-style-type: none"> <li>-Desire to solve community health problems</li> <li>-Bringing health services close</li> <li>-Being part of community</li> </ul>                                                                   |                                             |                                       |
| <ul style="list-style-type: none"> <li>-Wanting to get a better job</li> <li>- Desire to improve skills</li> <li>-Hope to enhance experience</li> </ul>                                                                                   |                                             |                                       |
| <ul style="list-style-type: none"> <li>-Conducting tasks at health post</li> <li>-Participating in meetings at health post</li> </ul>                                                                                                     | Enhancing professional skills               |                                       |
| <ul style="list-style-type: none"> <li>-Restricted duties at health post</li> <li>-Misallocation of tasks</li> <li>-Limited sharing of resources</li> </ul>                                                                               | Exclusion of CHAs from the health post      |                                       |
| <ul style="list-style-type: none"> <li>-Supervisor's knowledge of programme</li> <li>-Participating in supervisory meetings</li> <li>-Review of CHA reports</li> </ul>                                                                    | Supervision and work performance            |                                       |
| <ul style="list-style-type: none"> <li>-Payment processes</li> </ul>                                                                                                                                                                      | Monthly incentives and work motivation      |                                       |
| <ul style="list-style-type: none"> <li>-Type of services provided in the community</li> <li>-Support from the community</li> <li>-Respect from the community</li> </ul>                                                                   | Addressing health problems in the community | Experiences in the Community          |
